# Supplementary material for: Intercalating methylene blue in molecular beacon for sensitive detection of salivary TNF-α towards early diagnosis of oral cancer
Source: Royal Society of Chemistry journal article supplement (doi:10.1039/d2sd00035k), 2022-01-01
Supplement: d2sd00035k1.pdf [file d2sd00035k1.pdf]

## Supplementary Material

### Intercalating methylene blue to molecular beacon for sensitive detection of salivary TNF- $\alpha$ towards early diagnosis of oral cancer

Siyi Zou <sup>a</sup>, Hui Wei <sup>a</sup>, Xiaolin Cui <sup>b</sup>, Wing Cheung Mak <sup>c</sup>, Xuejin Li <sup>d</sup>, Guozhen Liu <sup>\*a</sup>

---

<sup>a</sup> School of Medicine, The Chinese University of Hong Kong, Shenzhen 518172, China. Email: Liugozhen@cuhk.edu.cn

<sup>b</sup> Christchurch Regenerative Medicine and Tissue Engineering (CReaTE) group, Department of Orthopaedic Surgery and Musculoskeletal Medicine, University of Otago, Christchurch, 8011, New Zealand.

<sup>c</sup> Department of Biomedical Engineering, The Chinese University of Hong Kong, Hong Kong SAR, China.

<sup>d</sup> School of Science and Engineering, The Chinese University of Hong Kong, Shenzhen 518172, China

#### Optimization of SPCE-GO-Apt (MB) sensing interface

Fig S1 showed the effect of different conditions including pH, the concentration of Na<sup>+</sup>, temperature and incubated time, on the sensing performance of the SPCE-GO-Apt (MB). When pH changed from 4 to 7.4, the release of methylene blue (MB) was gradually increased due to the instability of secondary structure of aptamer under the acidic condition, and thus hairpin opened and released the MB. While the DNA was denatured under alkaline conditions<sup>1</sup>, and thus less MB loaded (Fig. S1a). An optimal electrochemical signal was obtained when the sodium ion concentration was 100 mM (Fig. S1b). Fig. S1c shows when the temperature was higher than 60 °C, the release of MB has significant difference compared with at room temperature. Thus, the temperature for SPCE-GO-Apt (MB) sensing interface was set at 25 °C for subsequent experiments. Fig. S1d showed the incubation time of the sensing interface with the cytokine TNF- $\alpha$ . When the reaction time was within 30 min, the current signal of MB increased before it reached a plateau, therefore 30 min was selected as the optimal reaction time.

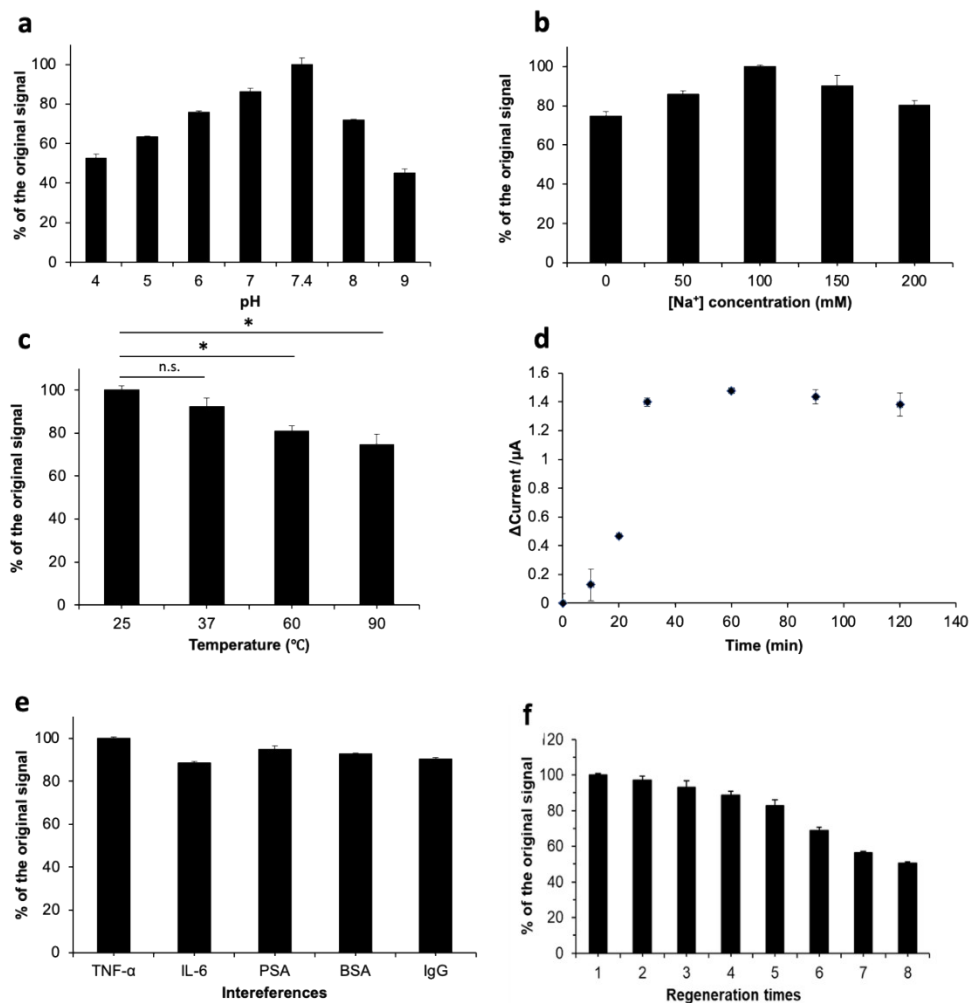

**Fig. S1.** Effect of (a) pH, (b) the concentration of [Na<sup>+</sup>], (c) temperature and (d) incubation time of TNF- $\alpha$  on the performance of SPCE-GO-Apt (MB) sensing interface for the detection of TNF- $\alpha$ . (e) The current response of SPCE-GO-Apt (MB) sensing interface for the selective study of four non-specific proteins of IL-6, PSA, BSA and mouse IgG in the presence of 50 pg mL<sup>-1</sup> TNF- $\gamma$ . (f) The reproducibility of SPCE-GO-Apt (MB) sensing interface for 100 pg mL<sup>-1</sup> TNF- $\alpha$ . (two-tailed Student's t test; \*,  $p < 0.05$ ).

**Table S1** Optimization of sensing interface conditions

| Parameters                       | Ranges                     | Optimal condition |
|----------------------------------|----------------------------|-------------------|
| pH value                         | 4, 5, 6, 7, 7.4, 8, 9      | 7.4               |
| Concentration of Na <sup>+</sup> | 0, 50, 100, 150, 200 mM    | 100 mM            |
| Temperature                      | 25, 37, 60, 90 °C          | 25 °C             |
| Incubated time                   | 0, 10, 20, 30, 60, 90, 120 | 30 min            |

**Comparison of developed electrochemical biosensor with other reported assays for the detection of TNF- $\alpha$**

**Table S2** Side-by-Side Comparison of the Analytical Features of Different electrochemical biosensors developed for TNF- $\alpha$  Detection

|                                                   | Recognition element | Sample        | Linear range (pg. mL <sup>-1</sup> ) | LOD (pg. mL <sup>-1</sup> ) | Ref.       |
|---------------------------------------------------|---------------------|---------------|--------------------------------------|-----------------------------|------------|
| SPCE-GO-Apt-MB                                    | Aptamer             | Saliva        | 10 -300                              | 10                          | This study |
| SPCE-GO-Apt (MB)                                  | Aptamer             | Saliva        | 1 -400                               | 1                           | This study |
| CMA-gold electrode                                | Antibody            | Saliva        | 1 -30                                | 1                           | 2          |
| SPAuE-Py/Py-COOH/MNPs                             | Antibody            | Saliva        | 1 -15                                | 0.3                         | 3          |
| SPCE-Magnetic beads                               | Antibody            | Serum         | 15 -405                              | 5.8                         | 4          |
| MoS <sub>2</sub> -based electrochemical biosensor | Antibody            | Serum         | 1-200                                | 0.202                       | 5          |
| SPCE@4-ABA                                        | Antibody            | Serum         | 3250-50,000                          | 4100                        | 6          |
| SPCE-Magnetic beads                               | Affibody®           | Serum         | 76-5,000                             | 38                          | 7          |
| HOOC-Phe-DWCNTs/SPCEs                             | Antibody            | Serum, Saliva | 1-200                                | 0.85                        | 8          |
| Ag@Pt-CNTs-CS SPCE                                | Antibody            | serum         | 6 - 60                               | 1.6                         | 9          |
| SPCE-ASPE immunosensor                            | Antibody            | serum         | 10 -100                              | 5                           | 10         |
| MB-tagged aptamer electrochemical sensor          | Aptamer             | Whole blood   | 10,000-100,000                       | 10,000                      | 11         |
| DSP@AuE                                           | Antibody            | Cell          | 1-100                                | 1                           | 12         |

**Abbreviations:** Gold electrode (AuE), carboxymethylaniline (CMA), carbon nanotubes and chitosan (CNTs-CS), graphite screen-printed electrode modified with poly-anthranilic acid (ASPE), screen-printed gold electrode (SPAuE), screen-printed carbon electrode (SPCE),

magnetic microparticles coated with poly(pyrrole-co-pyrrole-2-carboxylic acid) (Py/Py-COOH/MNPs), dithiobis-succinimidyl propionate (DSP)

## Reference

1. P. Ehrlich and P. Doty, *Journal of the American Chemical Society*, 1958, **80**, 4251-4255.
2. L. Barhoumi, A. Baraket, F. G. Bellagambi, G. S. Karanasiou, M. B. Ali, D. I. Fotiadis, J. Bausells, N. Zine, M. Sigaud and A. Errachid, *Sensors and Actuators B: Chemical*, 2018, **266**, 477-484.
3. L. Barhoumi, F. G. Bellagambi, F. M. Vivaldi, A. Baraket, Y. Clément, N. Zine, M. Ben Ali, A. Elaissari and A. Errachid, *Sensors*, 2019, **19**, 692.
4. U. Eletxigerra, J. Martinez-Perdiguero, S. Merino, R. Villalonga, J. Pingarrón and S. Campuzano, *Analytica Chimica Acta*, 2014, **838**, 37-44.
5. S. Sri, D. Chauhan, G. Lakshmi, A. Thakar and P. R. Solanki, *Electrochimica Acta*, 2022, **405**, 139736.
6. U. Eletxigerra, J. Martinez-Perdiguero and S. Merino, *Sensors and Actuators B: Chemical*, 2015, **221**, 1406-1411.
7. G. Baydemir, F. Bettazzi, I. Palchetti and D. Voccia, *Talanta*, 2016, **151**, 141-147.
8. E. Sánchez-Tirado, C. Salvo, A. González-Cortés, P. Yáñez-Sedeño, F. Langa and J. Pingarrón, *Analytica chimica acta*, 2017, **959**, 66-73.
9. M. Mazloun-Ardakani and L. Hosseinzadeh, *RSC advances*, 2015, **5**, 70781-70786.
10. M. Mazloun-Ardakani, L. Hosseinzadeh and Z. Taleat, *Microchimica Acta*, 2014, **181**, 917-924.
11. Y. Liu, Q. Zhou and A. Revzin, *Analyst*, 2013, **138**, 4321-4326.
12. T. S. Pui, P. Kongsuphol, S. K. Arya and T. Bansal, *Sensors and Actuators B: Chemical*, 2013, **181**, 494-500.
